# Supplementary material for: Comparative Profiling of TCR Repertoires in Extranodal NK/T-Cell Lymphoma and Healthy Individuals Highlights Unique Clonal Expansions and Potential Diagnostic Biomarkers
Source: Research Square preprint supplement (doi:10.21203/rs.3.rs-7756995/v1), 2025-11-18
Supplement: Supplementary file 1 [file 90b1ff27f6579e1263971984.xlsx]

## Sheet: Sheet1
Sample	Successfully aligned reads	Off target (non TCR/IG) reads	Reads with no V or J hits	Reads used in clonotypes	Alignments without assembling feature	Alignments dropped due to low sequence quality	Clones dropped in post-filtering	Alignments dropped in clones post-filtering
24C136308	89.69% [OK]	0.45% [OK]	1.15% [OK]	66.46% [ALERT]	18.87% [ALERT]	0.00% [OK]	0.00% [OK]	0.00% [OK]
24C136297	94.10% [OK]	0.35% [OK]	0.56% [OK]	78.83% [WARN]	10.46% [WARN]	0.00% [OK]	0.00% [OK]	0.00% [OK]
24C136294	92.69% [OK]	0.85% [OK]	1.59% [OK]	63.18% [ALERT]	25.60% [ALERT]	0.00% [OK]	0.00% [OK]	0.00% [OK]
24C136302	95.51% [OK]	0.60% [OK]	1.07% [OK]	74.24% [WARN]	17.21% [ALERT]	0.00% [OK]	0.00% [OK]	0.00% [OK]
24C136295	93.14% [OK]	0.12% [OK]	0.26% [OK]	84.13% [WARN]	3.50% [OK]	0.00% [OK]	0.00% [OK]	0.00% [OK]
24C136310	86.67% [OK]	0.49% [OK]	1.37% [OK]	65.01% [ALERT]	17.42% [ALERT]	0.00% [OK]	0.00% [OK]	0.00% [OK]
24C136311	94.13% [OK]	0.32% [OK]	0.58% [OK]	78.86% [WARN]	10.47% [WARN]	0.00% [OK]	0.00% [OK]	0.00% [OK]
24C137084	91.55% [OK]	0.25% [OK]	0.59% [OK]	79.37% [WARN]	7.30% [WARN]	0.00% [OK]	0.00% [OK]	0.00% [OK]
24C136300	92.73% [OK]	0.86% [OK]	1.58% [OK]	63.56% [ALERT]	25.24% [ALERT]	0.00% [OK]	0.00% [OK]	0.00% [OK]
24C137083	94.30% [OK]	2.63% [OK]	0.44% [OK]	84.17% [WARN]	5.11% [WARN]	0.00% [OK]	0.00% [OK]	0.00% [OK]
24C136304	89.97% [OK]	0.45% [OK]	1.14% [OK]	66.89% [ALERT]	18.67% [ALERT]	0.00% [OK]	0.00% [OK]	0.00% [OK]
24C136298	85.23% [OK]	0.32% [OK]	1.13% [OK]	64.19% [ALERT]	16.67% [ALERT]	0.00% [OK]	0.00% [OK]	0.00% [OK]
24C136309	85.64% [OK]	0.35% [OK]	1.12% [OK]	64.66% [ALERT]	16.61% [ALERT]	0.00% [OK]	0.00% [OK]	0.00% [OK]
24C136305	86.70% [OK]	0.36% [OK]	1.71% [OK]	68.19% [ALERT]	14.15% [WARN]	0.00% [OK]	0.00% [OK]	0.00% [OK]
24C136313	93.44% [OK]	0.19% [OK]	0.43% [OK]	84.38% [WARN]	3.49% [OK]	0.00% [OK]	0.00% [OK]	0.00% [OK]
24C136301	94.53% [OK]	0.70% [OK]	2.19% [OK]	59.21% [ALERT]	32.16% [ALERT]	0.00% [OK]	0.00% [OK]	0.00% [OK]
24C136299	92.63% [OK]	1.09% [OK]	1.37% [OK]	69.65% [ALERT]	18.98% [ALERT]	0.00% [OK]	0.00% [OK]	0.00% [OK]
24C136307	84.56% [WARN]	1.46% [OK]	4.12% [OK]	17.42% [ALERT]	66.03% [ALERT]	0.00% [OK]	0.00% [OK]	0.00% [OK]
24C136303	93.47% [OK]	0.19% [OK]	0.42% [OK]	84.40% [WARN]	3.51% [OK]	0.00% [OK]	0.00% [OK]	0.00% [OK]
24C136306	92.65% [OK]	1.05% [OK]	1.36% [OK]	69.65% [ALERT]	18.97% [ALERT]	0.00% [OK]	0.00% [OK]	0.00% [OK]
24C136312	86.66% [OK]	0.34% [OK]	1.70% [OK]	68.19% [ALERT]	14.15% [WARN]	0.00% [OK]	0.00% [OK]	0.00% [OK]
24C136296	94.58% [OK]	0.70% [OK]	2.16% [OK]	59.74% [ALERT]	31.64% [ALERT]	0.00% [OK]	0.00% [OK]	0.00% [OK]
